# Supplementary material for: Novel folic acid complex derived nitrogen and nickel co-doped carbon nanotubes with embedded Ni nanoparticles as efficient electrocatalysts for CO2 reduction
Source: Royal Society of Chemistry journal article supplement (doi:10.1039/c9ta12238a), 2020-01-01
Supplement: c9ta12238a1.pdf [file c9ta12238a1.pdf]

## Electronic Supplementary Information (ESI) for

### **Novel folic acid complex derived nitrogen and nickel co-doped carbon nanotubes with embedded Ni nanoparticles as efficient electrocatalysts for CO<sub>2</sub> reduction**

Xuewan Wang<sup>a</sup>, Dan Wu<sup>a</sup>, Chengzhi Dai<sup>a</sup>, Chenyu Xu<sup>b</sup>, Pengfei Sui<sup>b</sup>, Renfei Feng<sup>c</sup>,  
Yinping Wei<sup>d</sup>, Xian-Zhu Fu<sup>\*a</sup> and Jing-Li Luo<sup>\*ab</sup>

<sup>a</sup> *College of Materials Science and Engineering, Shenzhen University, Shenzhen 518060, China. Email: [xz.fu@szu.edu.cn](mailto:xz.fu@szu.edu.cn) (X.Z. Fu)*

<sup>b</sup> *Department of Chemical and Materials Engineering, University of Alberta, Edmonton, Alberta T6G 1H9, Canada. Email: [Jingli.Luo@ualberta.ca](mailto:Jingli.Luo@ualberta.ca) (J.L. Luo)*

<sup>c</sup> *Canadian Light Source Inc., Saskatoon, S7N 0X4, Saskatchewan, Canada*

<sup>d</sup> *Electron Microscopy Laboratory, Materials and Devices Testing center, Graduate School at Shenzhen, Tsinghua University, Shenzhen 518055, China*

Corresponding author

Email: [xz.fu@szu.edu.cn](mailto:xz.fu@szu.edu.cn) (X.Z. Fu)

Email: [Jingli.Luo@ualberta.ca](mailto:Jingli.Luo@ualberta.ca) (J.L. Luo)

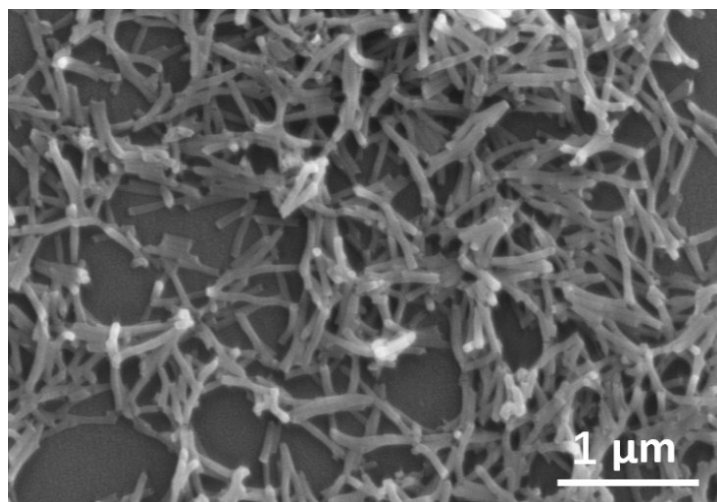

**Fig. S1** SEM image of Ni-FA complex nanotubes after a 10 min ultrasonication treatment.

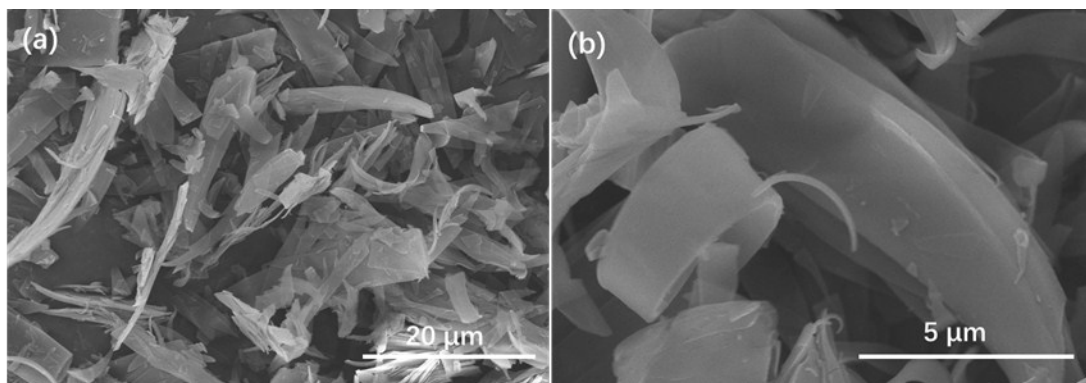

**Fig. S2** (a, b) FESEM images of FA.

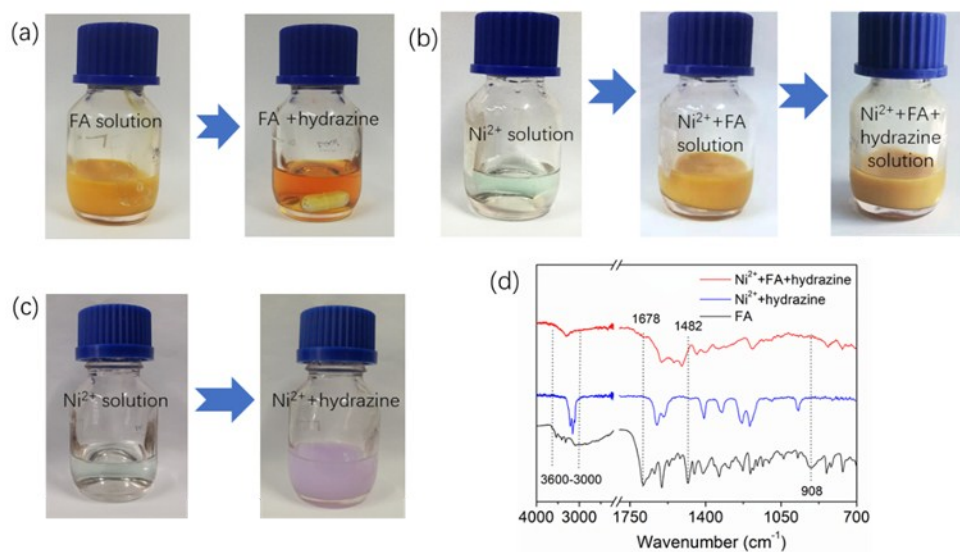

**Fig. S3** Photo images of (a) FA-hydrazine and (b) Ni<sup>2+</sup>-FA-hydrazine, (c) Ni<sup>2+</sup>- hydrazine reaction processes in H<sub>2</sub>O and ethanol mixture, and (d) the corresponding FTIR spectra of their products.

In comparison to FA, the markedly weakened  $\nu$  (C=O) peak (1687 cm<sup>-1</sup>) together with the absence of  $\delta$  (O-H) peak (908 cm<sup>-1</sup>) in the complex suggests the COO-Ni interaction. Meanwhile, the disappearance of pteridine ring peak (1482 cm<sup>-1</sup>) and -NH<sub>2</sub> peak (in the range of 3600-3000 cm<sup>-1</sup>) suggests a strong H bonding interaction between FA molecules in the complex. (References: *Int. J. Electrochem. Sci.*, 2011, **6**, 2943-2954; *J. Mater. Chem.*, 2012, **22**, 20291-20298)

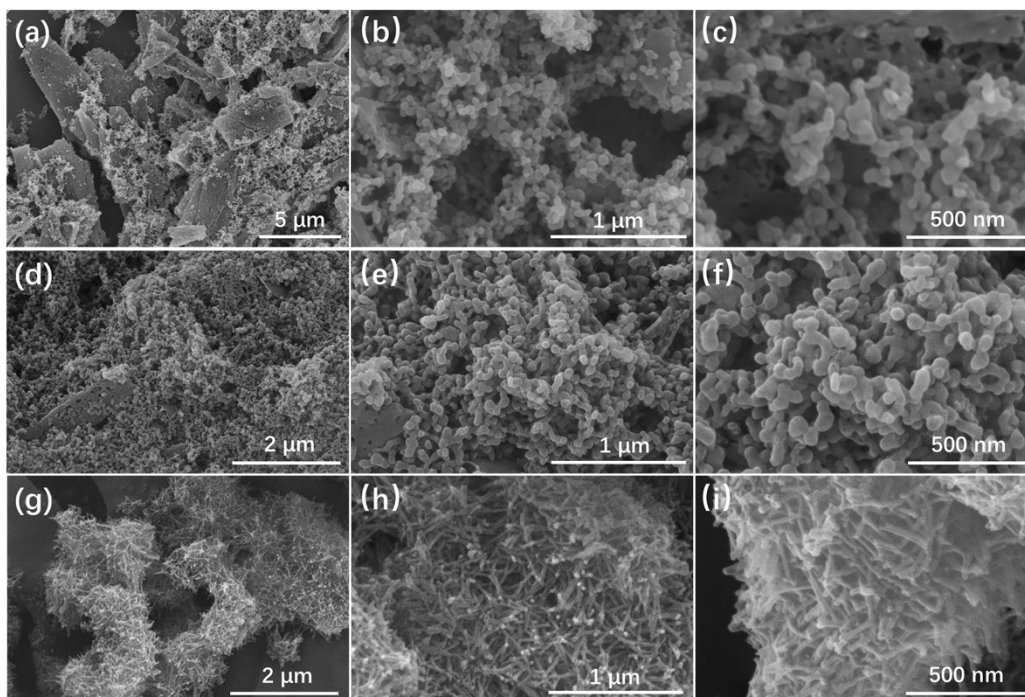

**Fig. S4** FESEM images of Ni-FA complex products hydrothermally prepared at room temperature (a-c), 60°C (d-f) and 100°C (g-i).

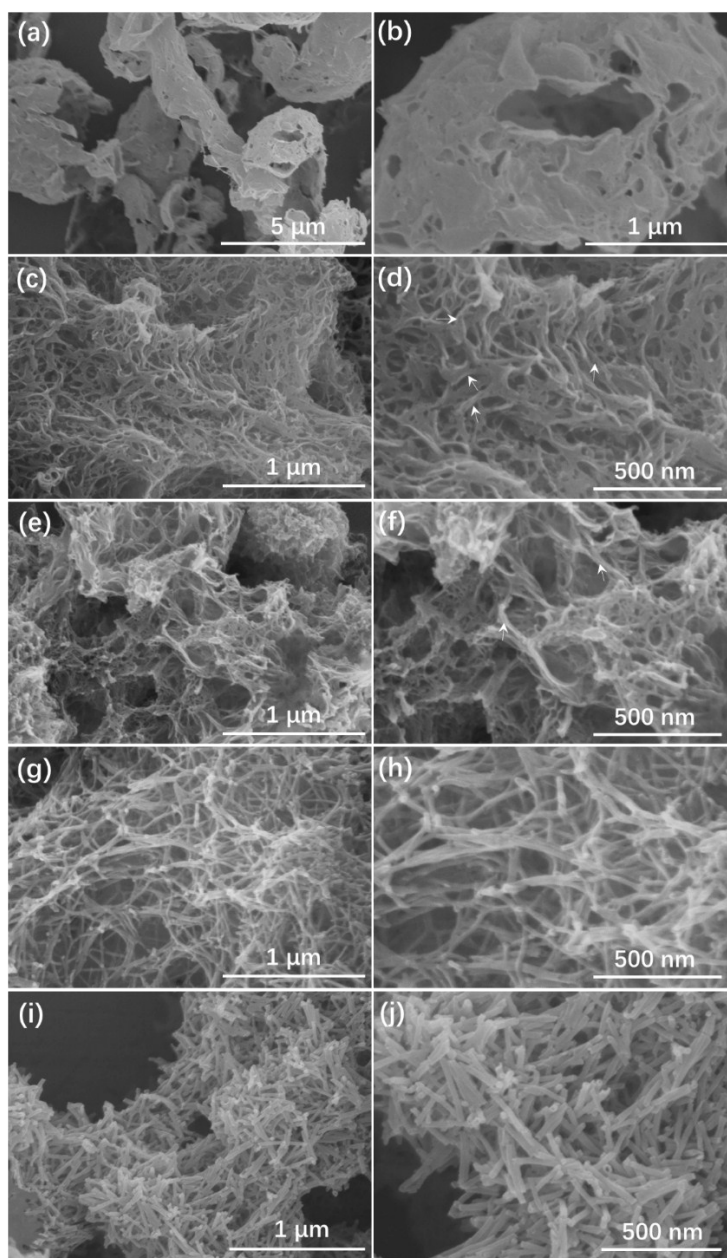

**Fig. S5** SEM images of Ni-FA complex products prepared by addition of 0 mL (a, b), 0.2 mL (c, d), 0.5 mL (e, f), 1.5 mL (g, h) and 2.5 mL (i, j) hydrazine. The white arrows in (d) and (f) denote the curled nanobelts which tend to form nanotubes. The white arrows in (d) and (f) denote the nanobelts that tend to curl into nanotubes.

The length of resulting nanotubes is reduced while the volume of hydrazine being increased from 1.5 mL to 2.5 mL. It is possibly attributed to a burst formation of Ni-FA NTs, which results in limited FA and  $\text{Ni}^{2+}$  to sustain their growth in length.

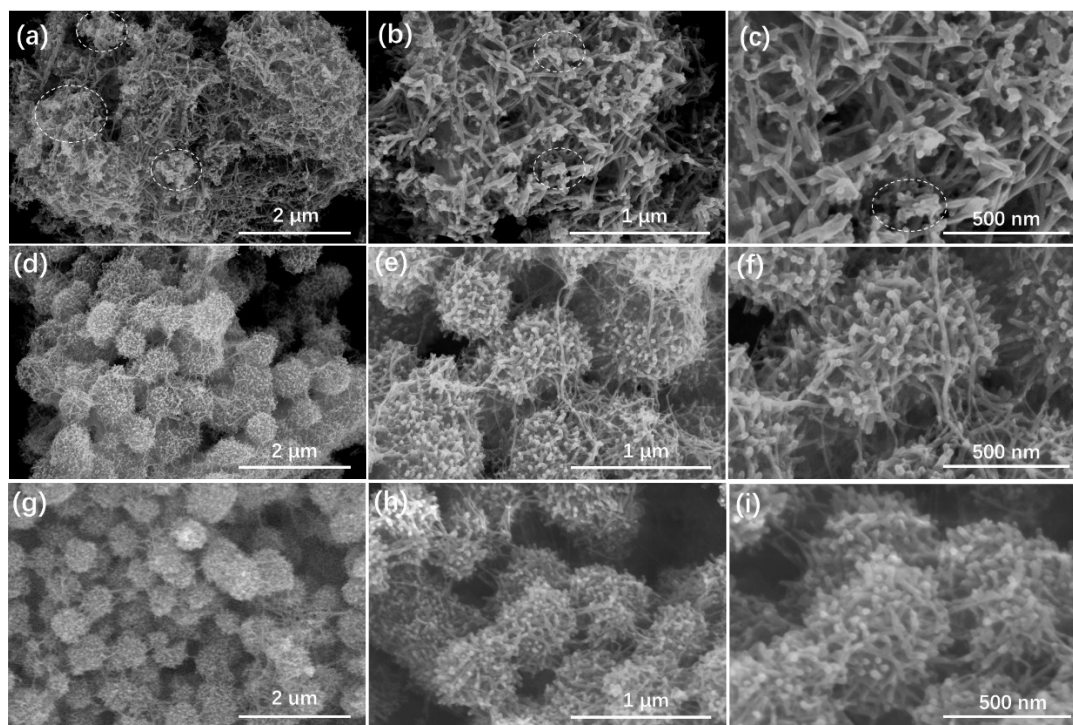

**Fig. S6** Ni-FA complex products prepared at different Ni-to-FA (0.25 mmol) ratio, (a-c) 0.125 mmol NiCl<sub>2</sub>, (d-f) 0.5 mmol NiCl<sub>2</sub> and (g-i) 1 mmol NiCl<sub>2</sub>. The white circles in (a-c) denote the super short Ni-FA NTs (<100 nm in length).

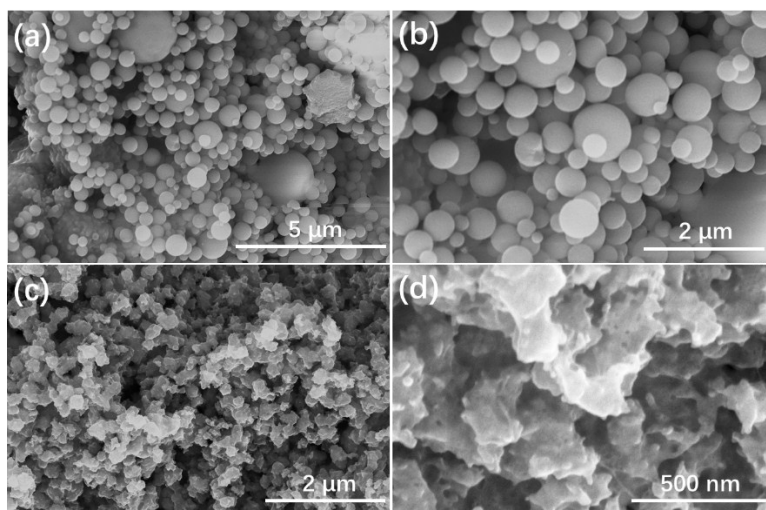

**Fig. S7** FESEM images of Ni-FA complex products prepared in pure water (a, b) and pure ethanol (c, d).



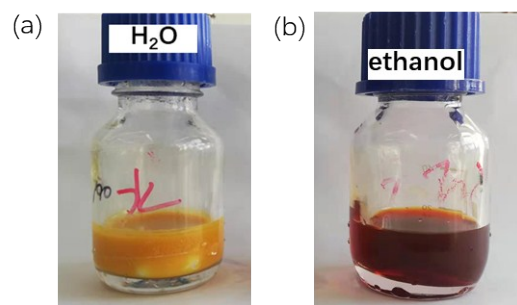

**Fig. S8** Folic acid (0.25 mmol) in 13.5 mL (a) DI water and (b) ethanol after an ultrasonication treatment for 30 min.

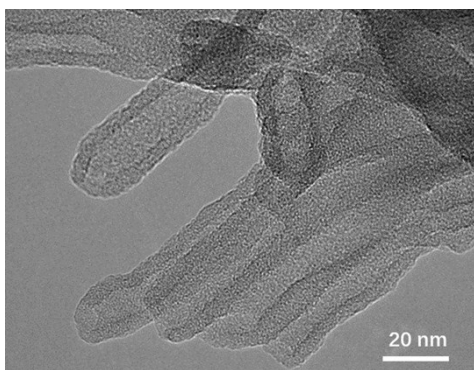

**Fig. S9** HRTEM image of unwashed Ni-FA NTs.

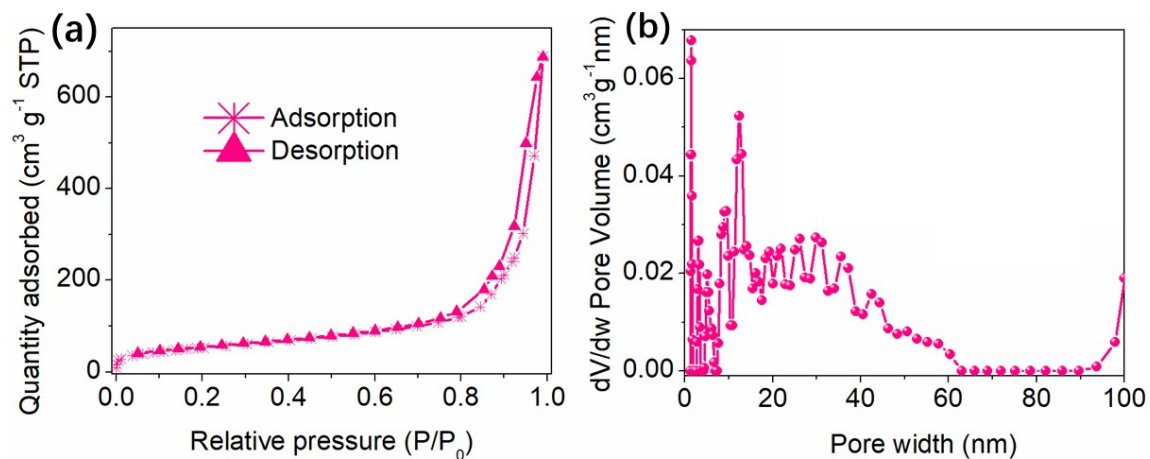

**Fig. S10** (a) N<sub>2</sub> adsorption and desorption isotherm and (b) pore size distribution of Ni-FA NTs. The specific Brunauer-Emmett-Teller (BET) surface area of Ni-FA NTs is measured to be 190 m<sup>2</sup> g<sup>-1</sup>. The pore size distribution curve in (b) shows a hierarchical micro-/meso-/macro-porous structure of Ni-FA NTs.

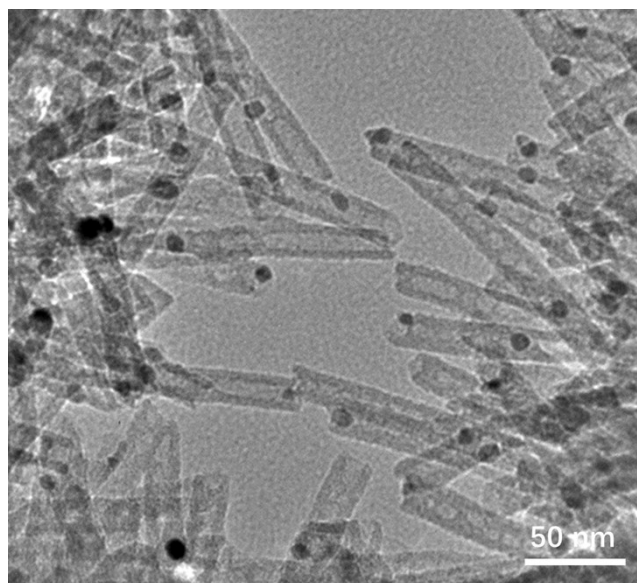

**Fig. S11** TEM image of pod-like nanotubes obtained by thermal pyrolysis of Ni-FA NTs at 450 °C under N<sub>2</sub> for 2h.

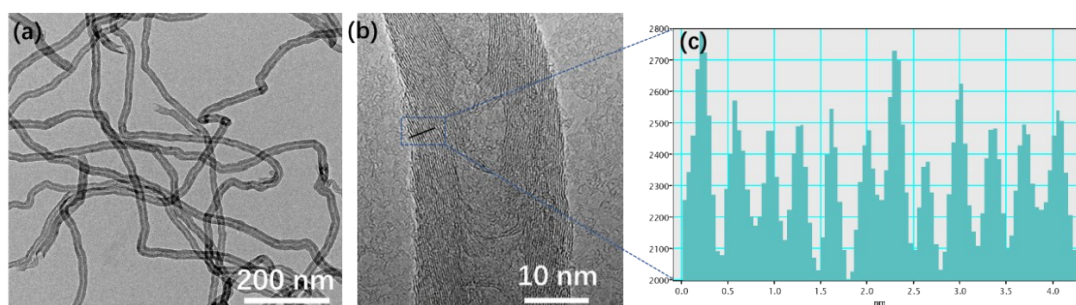

**Fig. S12** TEM images (a and b) of commercial multi-wall carbon nanotube (MWCNT) sample and (c) line profiles of interlayer distances of graphene sheets extracted from image (b). The commercial MWCNT sample is obtained from Shenzhen Nanotech Port Co. Ltd and used for comparison. It possesses a typical diameter of 10~20 nm and a length larger than 5  $\mu\text{m}$ . The average interlayer spacing of graphene sheets in the MWCNTs is measured in the range between 0.342 and 0.357 nm, representing the typical (002) plane of carbon. The sample has a specific surface area of 100~160  $\text{m}^2 \text{g}^{-1}$ .

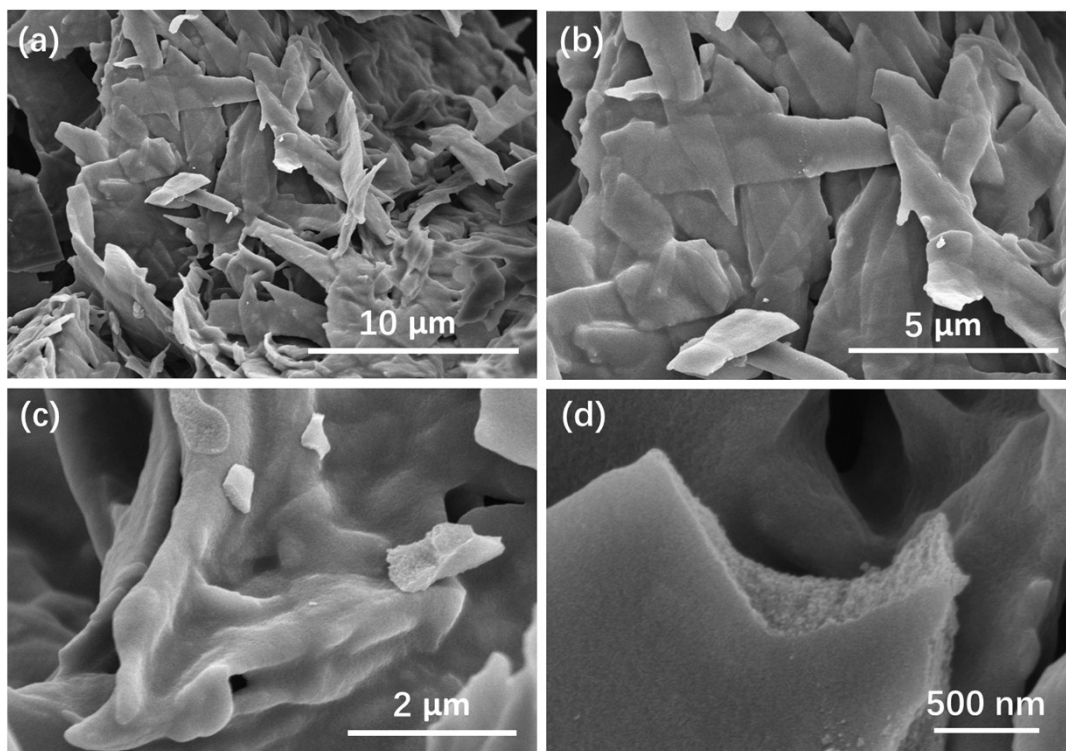

**Fig. S13** (a-d) SEM images of N doped carbon (denoted as FA-900) obtained from the direct pyrolysis of FA at 900°C under N<sub>2</sub> for 2h.

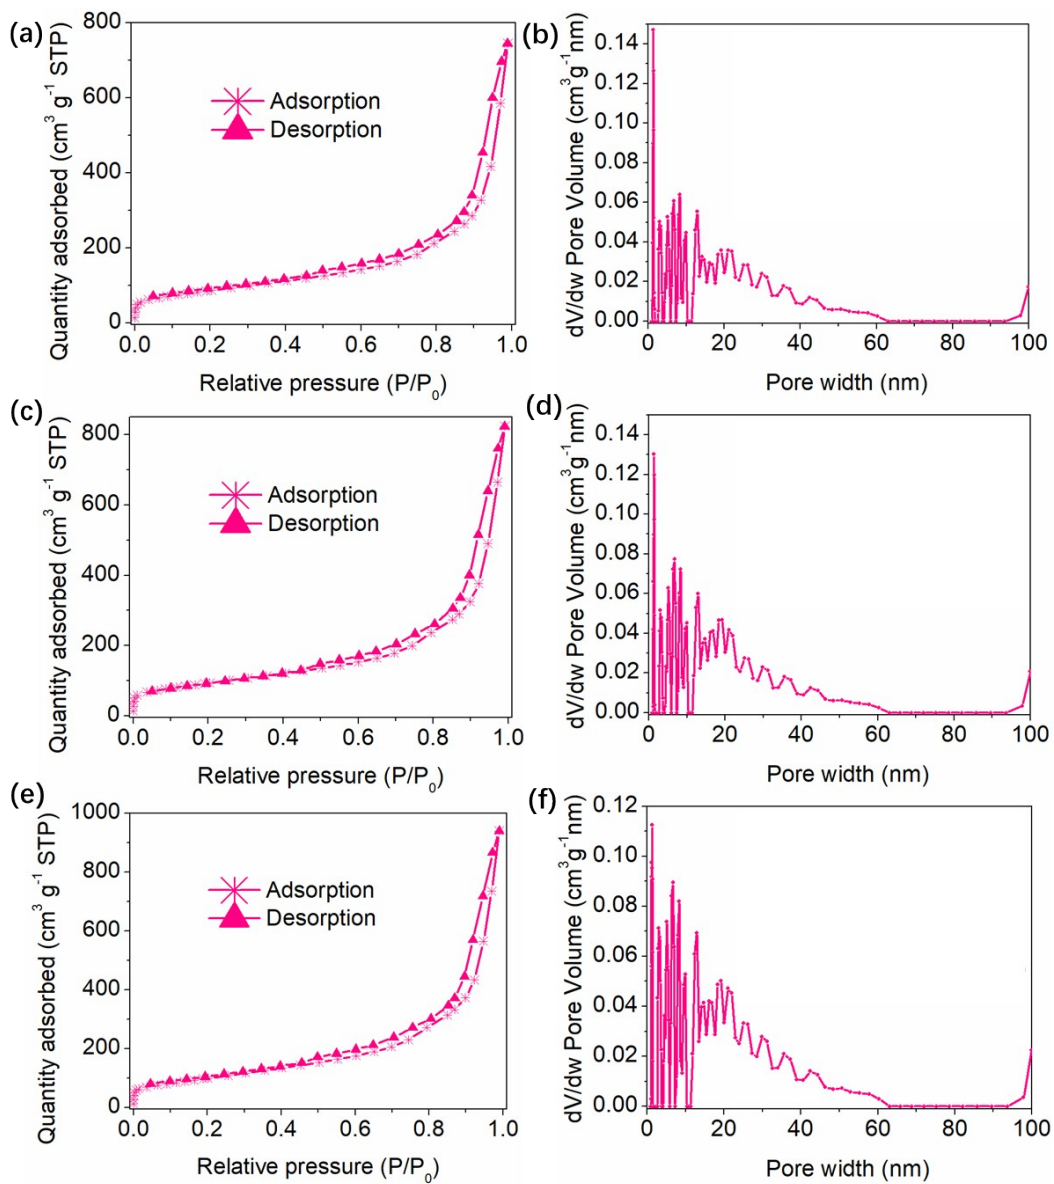

**Fig. S14**  $N_2$  adsorption/desorption isotherms of  $NiN_x/CNT-700$  (a), 800 (c) and 1000 (e) at 77 K. Pore size distribution of  $NiN_x/CNT-700$  (b), 800 (d) and 1000 (f).

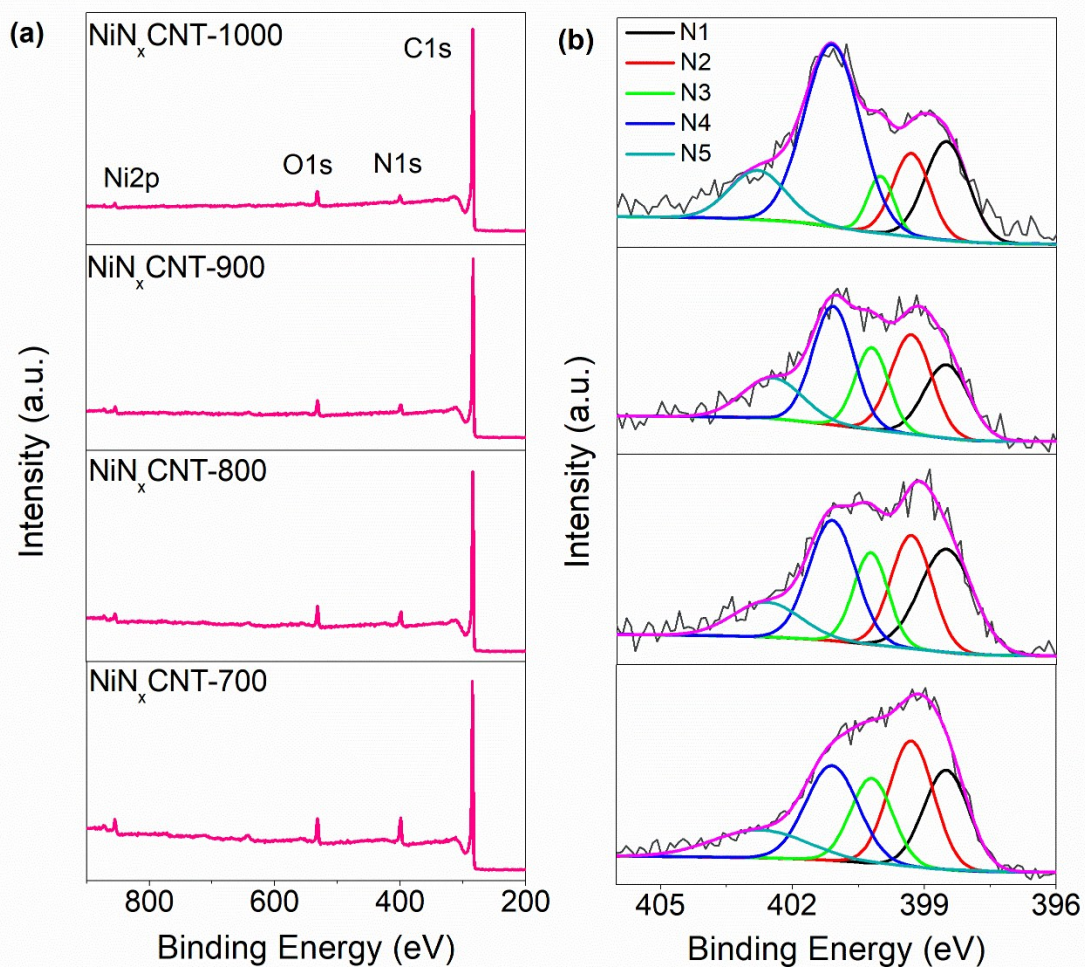

**Fig. S15** XPS survey spectrum (a) and high-resolution N 1s spectra (b) of Ni<sub>x</sub>CNT-700, 800, 900 and 1000. N1, N2, N3, N4 and N5 in (b) correspond to pyridinic N, Ni-N<sub>x</sub>, pyrrolic, quaternary and oxidized pyridinic N, respectively. The content of C, N, Ni and O elements of Ni<sub>x</sub>CNT samples are compared in Table S1.



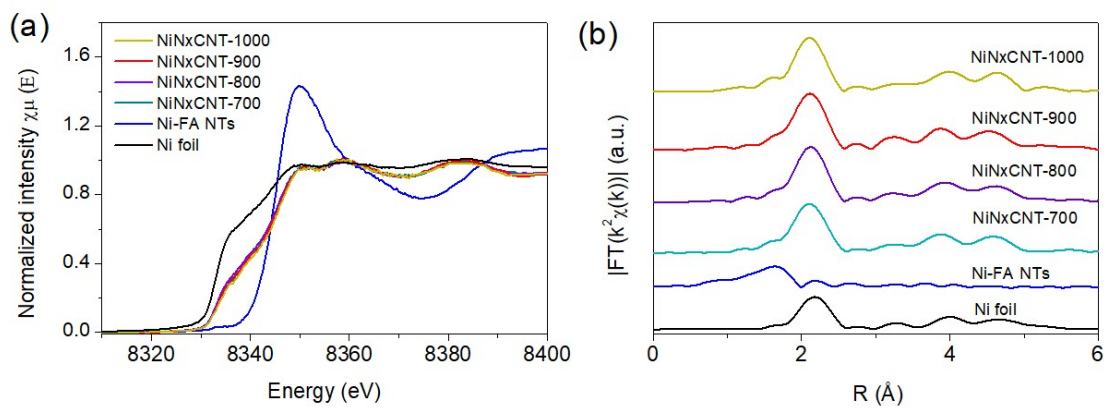

**Fig. S16** (a) Ni K-edge XANES spectra and (b) Fourier transformed EXAFS spectra of NiNx/CNT catalysts and the reference samples.

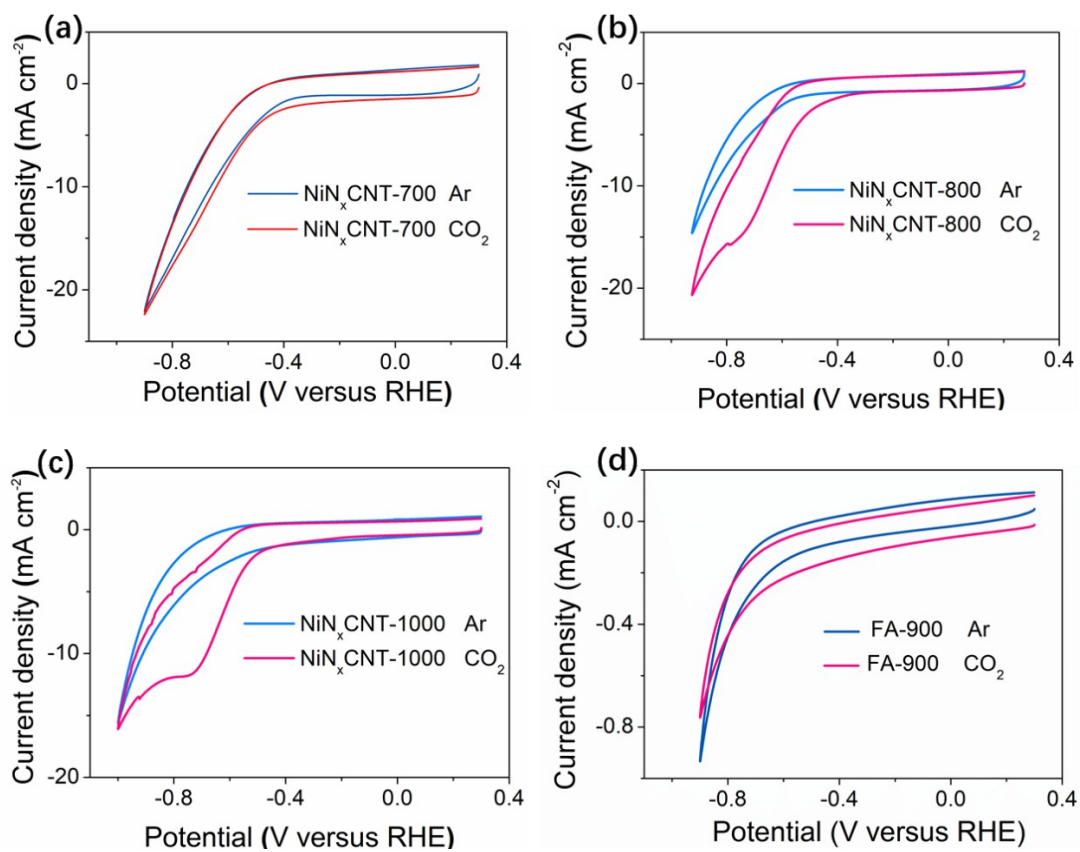

**Fig. S17** Cyclic voltammetry (CV) of NiN<sub>x</sub>CNT-700 (a), 800 (b), 1000 (c) and FA-900 (d) at 50 mV s<sup>-1</sup> in Ar and CO<sub>2</sub>-saturated 0.5 M KHCO<sub>3</sub> electrolyte.

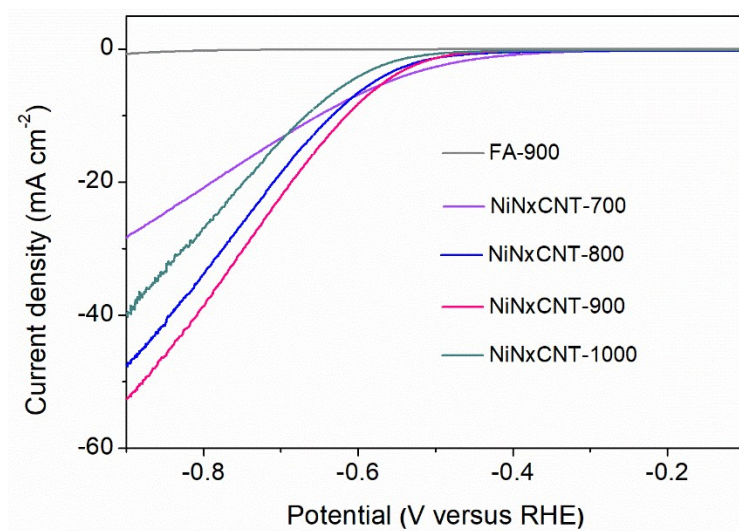

**Fig. S18** *iR*-corrected linear sweep voltammetry (LSV) of the catalyst samples at a scan rate of  $5 \text{ mV s}^{-1}$  and rotating rate of 1600 rpm with a catalyst loading of  $0.2 \text{ mg cm}^{-2}$ .

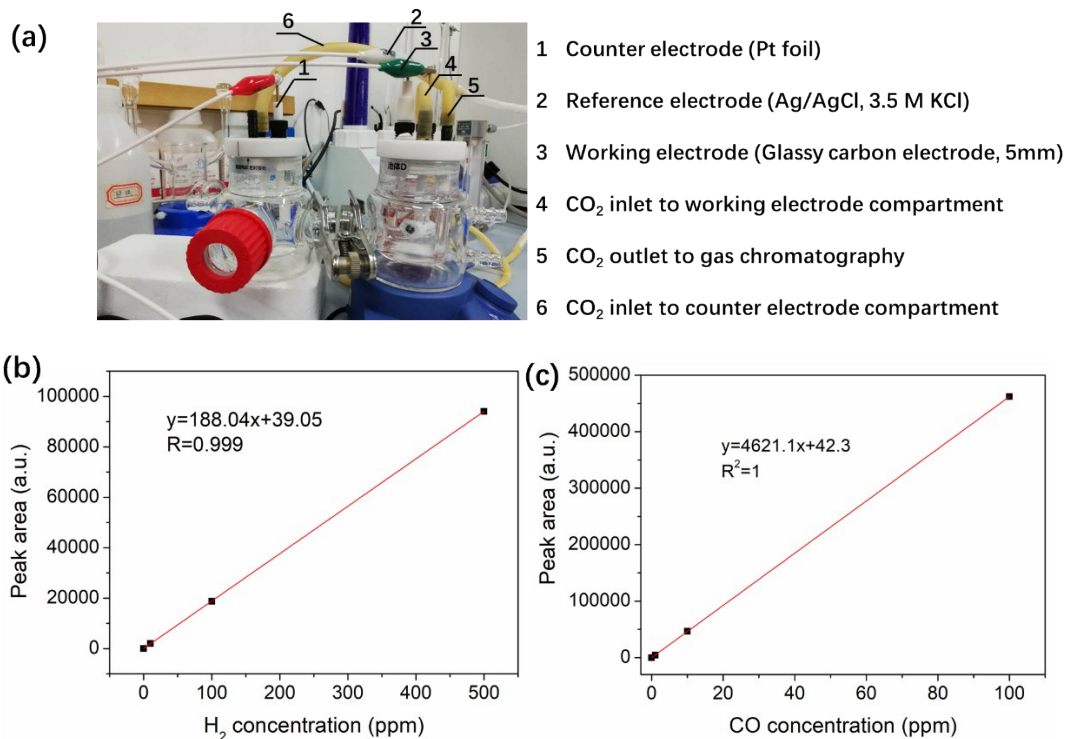

**Fig. S19** (a) Photo image of gas-tight two-compartment H-cell used for CO<sub>2</sub> reduction. GC calibration curve for H<sub>2</sub> (b) and for CO (c).

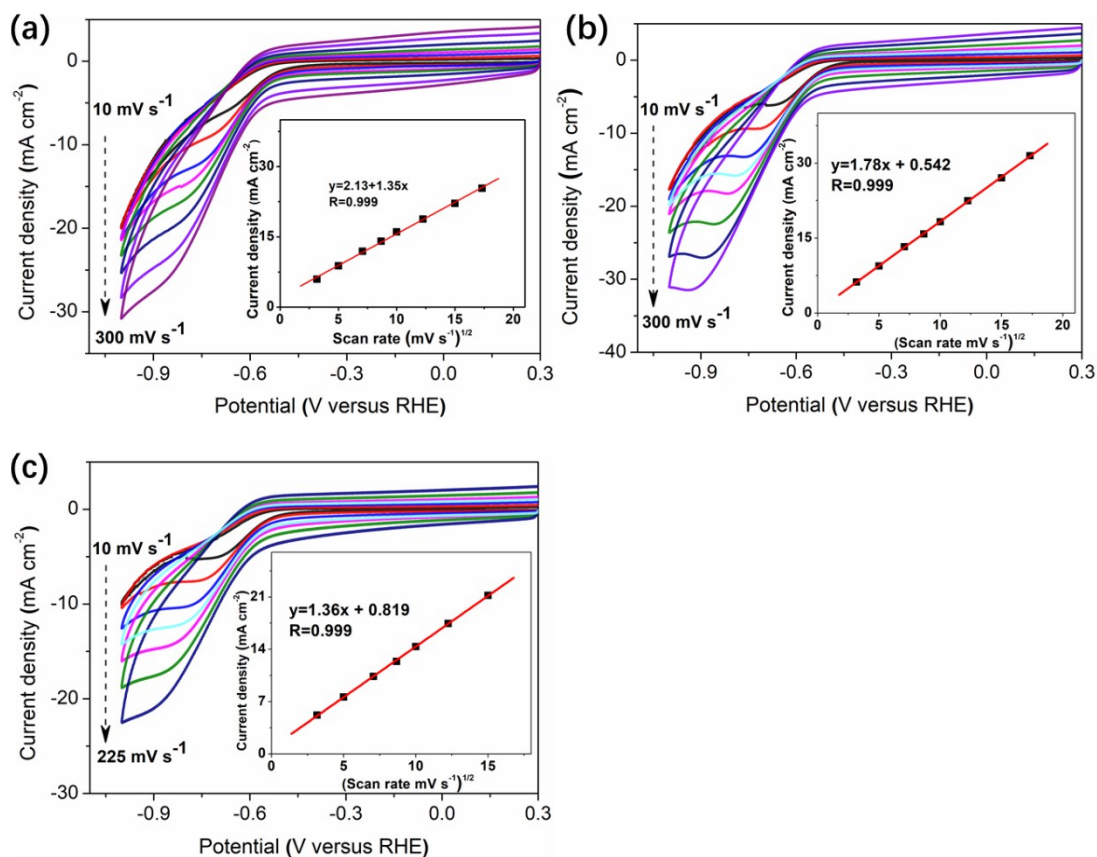

**Fig. S20** Cyclic voltammetry (CV) of NiN<sub>x</sub>CNT-800 (a), 900 (b) and 1000 (c) at scan rates of 10, 25, 50, 75, 100, 150, 225 and 300 mV s<sup>-1</sup>. Inset shows the peak current versus (scan rate)<sup>1/2</sup>. The CV of NiN<sub>x</sub>CNT-700 at different scan rates is not measured due to a poor stability.

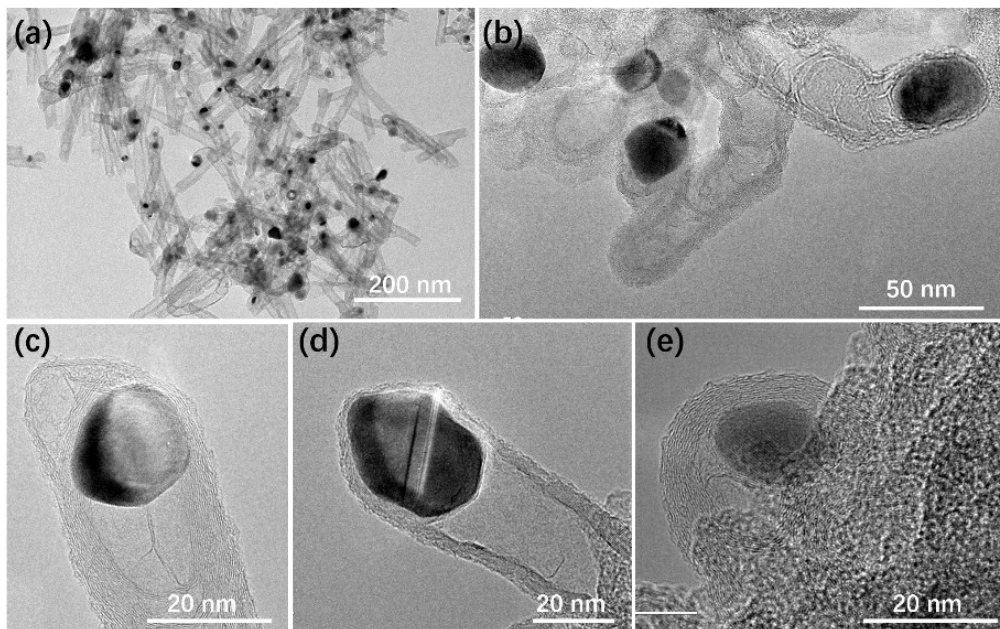

**Fig. S21** TEM (a) and HRTEM (b-e) images of NiN<sub>x</sub>CNT-900 at different positions.

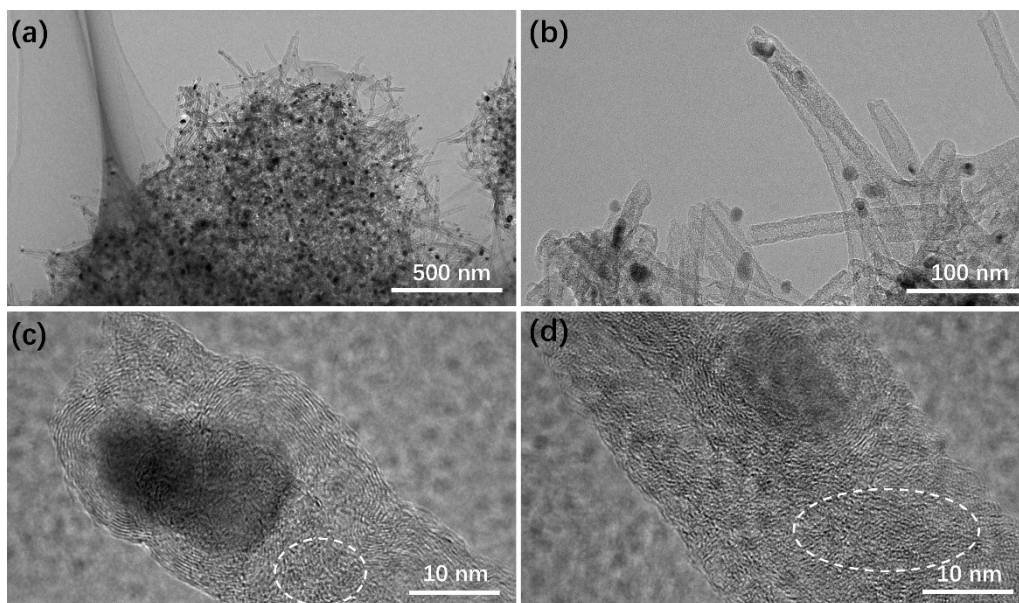

**Fig. S22** (a-d) TEM images of  $\text{NiN}_x\text{CNT-700}$  at different positions and magnifications. The white circles in (c) and (d) denote the highly disordered carbon lattice structure.

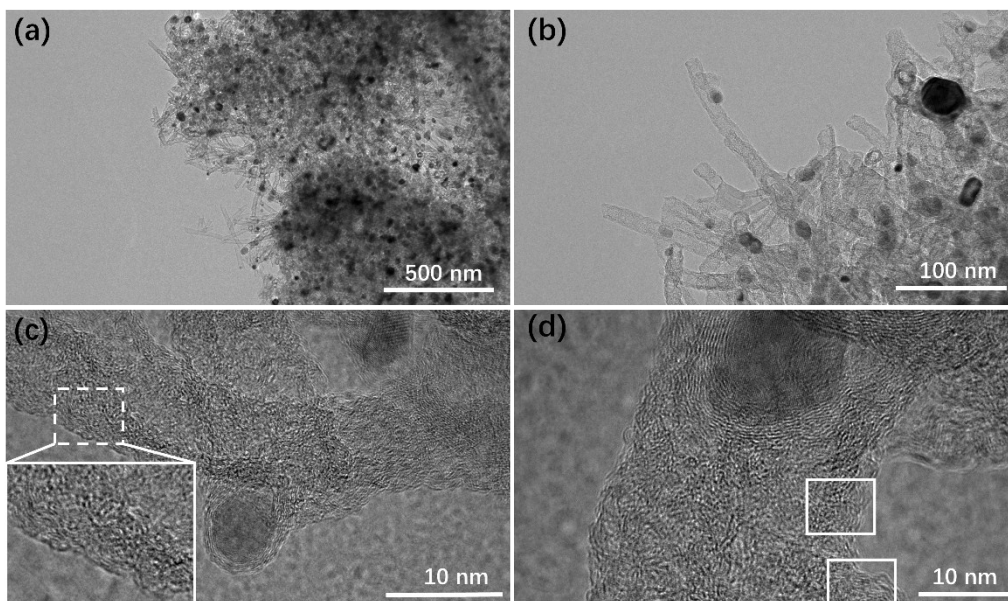

**Fig. S23** (a-d) TEM images of NiN<sub>x</sub>CNT-800 at different positions and magnifications. The white square in (c) and (d) denote the graphitic domains formed on the wall of CNTs.



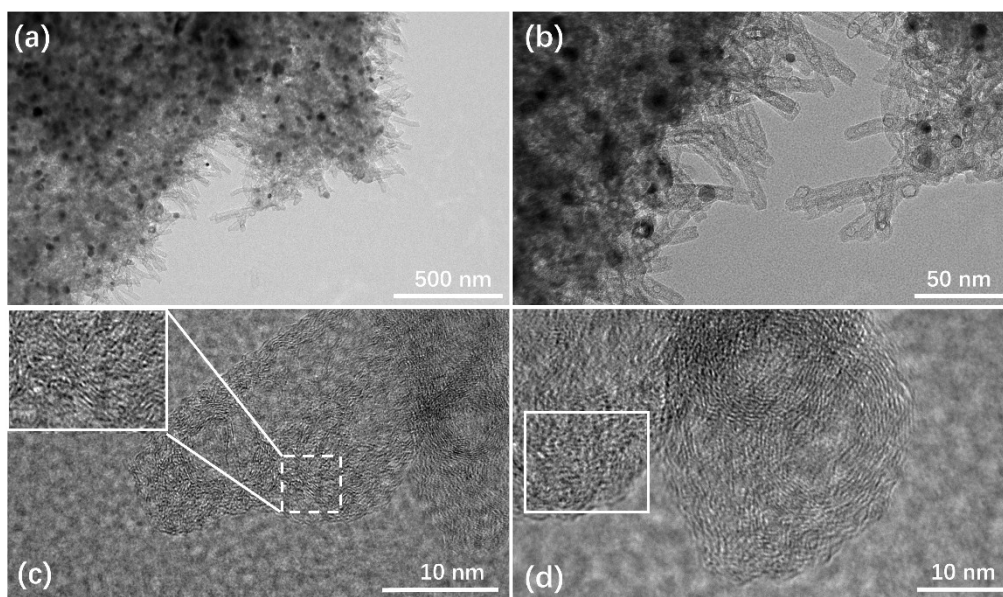

**Fig. S24** (a-d) TEM images of NiN<sub>x</sub>CNT-900 at different positions and magnifications. The white square in (c) and (d) denote the graphitic domains formed on the wall of CNTs.

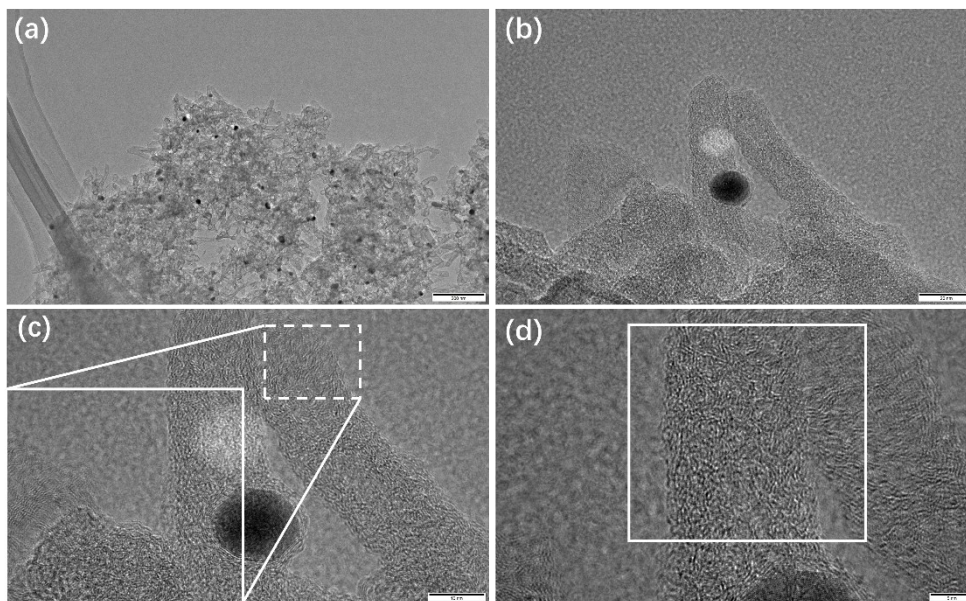

**Fig. S25** (a-d) TEM images of  $\text{NiN}_x\text{CNT-1000}$  at different positions and magnifications. The white square in (c) and (d) denote the graphitic domains formed on the wall of CNTs.

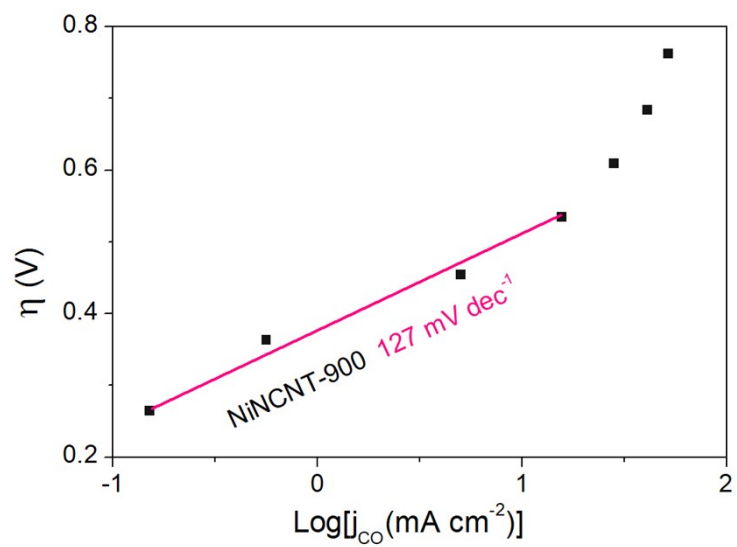

**Fig. S26** CO Tafel plot of NiN<sub>x</sub>CNT-900.

**Tab. S1** Elemental composition (XPS), specific area (BET) and Ni content (TGA) comparison of NiN<sub>x</sub>CNT catalyts prepared at different pyrolysis temperature.

| Element                                                                   | NiN <sub>x</sub> CNT-700 | NiN <sub>x</sub> CNT-800 | NiN <sub>x</sub> CNT-900 | NiN <sub>x</sub> CNT-1000 |
|---------------------------------------------------------------------------|--------------------------|--------------------------|--------------------------|---------------------------|
| <b>Elemental composition (at%) [From Fig. S15]</b>                        |                          |                          |                          |                           |
| C (at%)                                                                   | 80.75                    | 85.82                    | 89.21                    | 92.26                     |
| N (at%)                                                                   | 11.41                    | 7.46                     | 5.66                     | 3.47                      |
| Ni (at%)                                                                  | 1.15                     | 0.82                     | 0.59                     | 0.45                      |
| O (at%)                                                                   | 6.7                      | 5.89                     | 4.53                     | 3.82                      |
| <b>Relative concentration of N functionalities (%) [From Fig. S15]</b>    |                          |                          |                          |                           |
| Pyridinic N                                                               | 21.27                    | 25.97                    | 18.89                    | 19.14                     |
| Ni-N <sub>x</sub>                                                         | 26.51                    | 21.83                    | 23.43                    | 14.40                     |
| Pyrrolic N                                                                | 16.73                    | 14.82                    | 15.78                    | 6.66                      |
| Graphitic N                                                               | 23.27                    | 26.40                    | 27.93                    | 47.43                     |
| N-O                                                                       | 12.22                    | 10.98                    | 13.96                    | 12.38                     |
| <b>Specific area (m<sup>2</sup>g<sup>-1</sup>) [From Fig. 4d and S14]</b> |                          |                          |                          |                           |
| BET surface area                                                          | 310.6                    | 333.9                    | 314.4                    | 369.4                     |
| Micropore area                                                            | 254.2                    | 267.0                    | 238.8                    | 268.9                     |
| <b>Content of Ni (wt%) [From TGA measurements]</b>                        |                          |                          |                          |                           |
| Ni                                                                        | 33.7                     | 30.4                     | 27.9                     | 24.2                      |

**Tab. S2** Comparison of the NiN<sub>x</sub>CNT-900 catalyst with recently reported high-performance transition metal-based and noble metal-based electrocatalysts for CO<sub>2</sub> reduction to CO.

| Catalyst                 | Precursors                                                | $j_{CO}$<br>(mA cm <sup>-2</sup> ) | Potential<br>(V versus RHE) <sup>a)</sup> | Catalyst<br>loading<br>(mg cm <sup>-2</sup> ) | Electrolyte<br>(pH)           | Maximum FE <sub>CO</sub> (%) | Ref. <sup>b)</sup> |
|--------------------------|-----------------------------------------------------------|------------------------------------|-------------------------------------------|-----------------------------------------------|-------------------------------|------------------------------|--------------------|
| NiN <sub>x</sub> CNT-900 | Bioligand-Ni <sup>2+</sup><br>complex                     | 9.0                                | -0.68                                     | 0.2                                           | 0.5 M KHCO <sub>3</sub> (7.2) | 98.3 (-0.68~-0.98 V)         | This work          |
| Ni SAs/ NCNTs            | ZIF-8+DCD+<br>Ni <sup>2+</sup>                            | ~10                                | -0.70                                     | 0.8                                           | 0.5 M KHCO <sub>3</sub> (7.2) | 97 (-0.9~-1.0 V)             | 19                 |
| Ni-N-graphene            | GO+Ni <sup>2+</sup> +NH <sub>3</sub>                      | ~5.0                               | -0.80                                     | 0.2                                           | 0.5 M KHCO <sub>3</sub> (7.2) | ~90                          | 38                 |
| Ni-N-MEGO                | Graphene+Ni<br>+urea+NH <sub>3</sub>                      | ~27.0                              | -0.70                                     | 0.5                                           | 0.5 M KHCO <sub>3</sub> (7.2) | 92.1                         | 20                 |
| Ni-N-C                   | Urea+citric<br>acid+Ni <sup>2+</sup>                      | ~8.2                               | -0.75                                     | 0.3                                           | 0.1 M KHCO <sub>3</sub> (6.8) | 96 (-0.75 V)                 | 15                 |
| Ni SAs/N-C               | Ni <sup>2+</sup> -<br>exchanged<br>ZIF8                   | ~7.5                               | -1.0                                      | 0.2                                           | 0.5 M KHCO <sub>3</sub> (7.2) | ~70                          | 19                 |
| Fe-N-graphene            | GO+Fe <sup>3+</sup> +NH <sub>3</sub>                      | ~1.7                               | -0.60                                     | 1.0                                           | 0.1 M KHCO <sub>3</sub> (6.8) | 80                           | 47                 |
| Fe-N-CNTs                | Graphene/Fe <sup>3+</sup><br>+melamine+L                  | ~2.8                               | -0.66                                     | 2.0                                           | 0.1 M KHCO <sub>3</sub> (6.8) | 95.8 (-0.66 V)               | 48                 |
| Ni-N <sub>4</sub> -C     | Ni doped g-<br>C <sub>3</sub> N <sub>4</sub> +<br>glucose | 28.6                               | -0.81                                     | 0.2                                           | 0.5 M KHCO <sub>3</sub> (7.2) | 99 (-0.71~-0.91 V)           | 49                 |
| Ni(l)-N-graphene         | Melamine +<br>L-alanine +<br>Ni <sup>2+</sup>             | ~10                                | -0.50                                     | 0.4                                           | 0.5 M KHCO <sub>3</sub> (7.3) | 97 (-0.5~-0.7 V)             | 14                 |
| Au nanowire              | HAuCl <sub>4</sub>                                        | ~8.2                               | -0.35                                     | 81.6                                          | 0.5 M KHCO <sub>3</sub> (7.2) | 94                           | 7                  |
| Porous Ag                | Ag-Al alloy                                               | ~8.7                               | -0.50                                     | -                                             | 0.5 M KHCO <sub>3</sub> (7.2) | 92                           | 50                 |

<sup>a)</sup> The potential value corresponds to the potential that obtains the  $j_{CO}$  in the 2<sup>nd</sup> column.

<sup>b)</sup> The references can be found in the manuscript.
